# Supplementary material
Source: PubMed Central journal article supplement (PMC10193257)
Supplement: jamapsychiatry-e225068-s002.pdf [file jamapsychiatry-e225068-s002.pdf]

## Data Sharing Statement

Haroz. Evaluation of the Risk Identification for Suicide and Enhanced Care Model in a Native American Community. *JAMA Psychiatry*. Published May 17, 2023.

doi:10.1001/jamapsychiatry.2022.5068

### Data

**Data available:** No

### Additional Information

**Explanation for why data not available:** The data is owned by the White Mountain Apache Tribe and is not available.
